# Supplementary material
Source: PubMed Central journal article supplement (PMC4165450)
Supplement: ac502176n_si_001.pdf [file ac502176n_si_001.pdf]

**New Glycoproteomics Software, *GlycoPep Evaluator*, Generates  
Decoy Glycopeptides *de novo* and Enables Accurate False Discovery  
Rate Analysis for Small Data Sets**

*Zhikai Zhu, Xiaomeng Su, Eden P. Go and Heather Desaire\**

Department of Chemistry, University of Kansas, Lawrence, Kansas 66047, United States

**Supporting Information**

\* Corresponding author. Phone: 785-864-3015, Fax: 785-864-5396, E-mail: hdesaire@ku.edu.

| Name   | Composition                    | Mono <i>m/z</i> | Score   | Name   | Composition                      | Mono <i>m/z</i> | Score   |
|--------|--------------------------------|-----------------|---------|--------|----------------------------------|-----------------|---------|
| target | NAAGN(1743.6078)FSEPSDSSGAIAR  | 1199.1564       | 7.1353  | target | WEPPLDDGGSEIIN(1419.5022)YTLEK   | 1199.1871       | 6.4289  |
| decoy  | ARMEARFN(1691.6261)FTEFGAEK    | 1199.1842       | 13.9909 | decoy  | SGKAAFFEDPHMDN(1297.4379)ESPKYK  | 1199.1673       | 17.757  |
| decoy  | AMGLLHN(1465.2924)VTRVHELAVKNK | 1199.1678       | 8.9555  | decoy  | DMGVVFFDRSTAQNAN(1278.4196)DTNSK | 1199.1619       | 11.0005 |
| decoy  | NLYRN(1637.6116)RSYFYMQFR      | 1199.1918       | 8.7201  | decoy  | FYEN(1260.2990)KSVRQHMLQLNNWK    | 1199.1634       | 8.5615  |
| decoy  | DFHFN(1836.6616)KSKTAYNMR      | 1199.1714       | 7.5505  | decoy  | NMFESDLVN(1536.6530)DSRKDCTK     | 1199.1965       | 7.3229  |
| decoy  | EYYGEFERN(1654.6437)TSQYVR     | 1199.1785       | 7.2385  | decoy  | YTNWQLLKHQMGQN(1261.4319)DSGWK   | 1199.185        | 5.9909  |
| decoy  | QFN(1694.6892)KTEMMRDTWADK     | 1199.1906       | 6.8453  | decoy  | SHYAHKFNCN(1267.3433)FTMHLRHK    | 1199.1535       | 4.5889  |
| decoy  | GQTEHVPVQKEPKN(1547.4872)VSDR  | 1199.1846       | 6.2557  | decoy  | N(1296.5354)STTTDNTDKDLHSYCRR    | 1199.1835       | 4.4139  |
| decoy  | QYHANCEMNVN(1677.7382)YSCK     | 1199.1735       | 5.7624  | decoy  | WGYDFVN(1361.4380)YTARKVDLVCK    | 1199.1863       | 4.397   |
| decoy  | QQFNEWN(1643.5779)MSYAYDKK     | 1199.1523       | 4.9396  | decoy  | NCVKEHVYENREN(1388.5277)VTOR     | 1199.1835       | 3.5648  |
| decoy  | LLMPDVPCSSN(1913.6774)SSFK     | 1199.1615       | 4.9396  | decoy  | ACYMVYN(1575.6397)WSARWVEGK      | 1199.1916       | 3.1565  |
| decoy  | MPTFSKMN(1887.6664)YTFRGK      | 1199.1719       | 4.4829  | decoy  | WFTHCN(1580.6961)NTDGLDCCSK      | 1199.1649       | 2.8399  |
| decoy  | N(1755.4980)NSRPRYWFMSLLR      | 1199.152        | 4.0451  | decoy  | VQNCN(1409.4679)WTAQVVSQSTDAATR  | 1199.1586       | 2.6244  |
| decoy  | NNCQDHRN(1718.6897)YSVSVQR     | 1199.1837       | 3.9602  | decoy  | QN(1391.4678)WTKNWPNEHNFFTLK     | 1199.1832       | 2.5942  |
| decoy  | HEN(1845.6606)VSNEHTMGPNKR     | 1199.1613       | 2.965   | decoy  | HYLCN(1376.5606)TTEYHTFQEGYR     | 1199.1788       | 2.3244  |
| decoy  | SFTRN(1604.4920)ATLTYGYRSPR    | 1199.172        | 2.5651  | decoy  | VGN(1340.3951)YTGTEAPKVVWCVRYR   | 1199.1829       | 2.1679  |
| decoy  | ESWVKFHQVNN(1474.5269)HSAPGQR  | 1199.1929       | 0       | decoy  | QNFSRN(1578.6032)HSWKGNVVEEK     | 1199.1938       | 0       |
| decoy  | RVAN(1668.4876)ATGLVYTRLYTK    | 1199.1927       | 0       | decoy  | KYFVDVGLSN(1518.4152)RTEEYTR     | 1199.1549       | 0       |
| decoy  | DQAMYAACN(1792.7393)ESMKQR     | 1199.1719       | 0       | decoy  | WFFNQNTYDN(1546.5598)NTTEVR      | 1199.1614       | 0       |
| decoy  | NCMLN(1831.7240)YTVGWFAK       | 1199.1696       | 0       | decoy  | HKMFYFTNWHN(1470.5188)DTGQAK     | 1199.1681       | 0       |
| decoy  | HVGFSSCKN(1790.6631)GSGQLNGR   | 1199.1762       | 0       | decoy  | SLN(1471.4626)WSAKPDMSTATRMTAR   | 1199.1699       | 0       |

  

| Name   | Composition              | Mono <i>m/z</i> | Score  | Name   | Composition                      | Mono <i>m/z</i> | Score   |
|--------|--------------------------|-----------------|--------|--------|----------------------------------|-----------------|---------|
| target | TCILEILN(2303.8409)STK   | 1199.1827       | 5.4209 | target | LN(1378.4328)GSAPIQVCWYRDGVLLR   | 1199.2024       | 2.0622  |
| decoy  | ALHFAAGN(2280.7746)VTWK  | 1199.1615       | 7.5504 | decoy  | RSVNLN(1363.3711)KTGTNPGEYLPR    | 1199.1742       | 15.3993 |
| decoy  | PWWEN(2291.8156)KSTQK    | 1199.1577       | 6.5228 | decoy  | NWWSCWAN(1182.5144)CTRVEGGASMLK  | 1199.1975       | 9.6913  |
| decoy  | YCSLN(2314.9140)TSGNHK   | 1199.1658       | 5.9909 | decoy  | APRPCN(1518.5499)NSRCTQNWR       | 1199.1556       | 8.881   |
| decoy  | WQQPN(2341.8339)HTKSK    | 1199.1624       | 5.126  | decoy  | QAVVRKLAYYFN(1550.4671)NTAMR     | 1199.1856       | 6.6824  |
| decoy  | N(2283.9264)TSDQWRYNK    | 1199.1829       | 4.2816 | decoy  | N(1279.4870)DTQEDEPRAPNASVRMNSGK | 1199.1883       | 5.9909  |
| decoy  | GDSN(2245.8074)RTPGYKVR  | 1199.1714       | 4.1285 | decoy  | VVLSLCN(1278.3198)CTRDYVYKSPDK   | 1199.1553       | 5.2002  |
| decoy  | RYGN(2168.8991)QSTNACQK  | 1199.1876       | 3.8859 | decoy  | DCHAACWDAKVRN(1375.5599)TSDK     | 1199.1818       | 4.6675  |
| decoy  | YLN(2283.7518)GSTSKWKK   | 1199.1573       | 3.5251 | decoy  | GGEEQMAVVKYN(1305.5171)ESQEENK   | 1199.1748       | 4.6356  |
| decoy  | WN(2262.7918)ASADTKQRR   | 1199.1611       | 3.1565 | decoy  | EHNFGPVYCTGN(1356.5390)WSMFHR    | 1199.1711       | 4.4829  |
| decoy  | N(2145.8925)VTAPSSMDEQDR | 1199.1782       | 2.9745 | decoy  | GDLCLYRGVN(1529.6517)TTYDCK      | 1199.1935       | 4.1652  |
| decoy  | GRWN(2239.6750)LSRVLR    | 1199.1638       | 0      | decoy  | ETDNAHNLEEPSN(1252.4670)LSGNWR   | 1199.1624       | 3.5648  |
| decoy  | PAEN(2293.9808)CSEPNRK   | 1199.1952       | 0      | decoy  | SCDHAFMPFN(1323.6879)CSGWCHCMK   | 1199.1892       | 3.5251  |
| decoy  | N(2264.8949)WTMNEWHGR    | 1199.1614       | 0      | decoy  | N(1230.5094)MSETQFEFWMYMMYNGR    | 1199.1595       | 3.1845  |
| decoy  | N(2458.0150)GTQEFQWK     | 1199.1873       | 0      | decoy  | MGN(1535.5851)WTWMKKWQEGYSK      | 1199.1838       | 2.3039  |
| decoy  | GSHLAKGRN(2252.8488)CSR  | 1199.1797       | 0      | decoy  | AAKAEN(1402.4966)FSYSQKLSCSHHK   | 1199.1872       | 2.1122  |
| decoy  | YVCN(2246.8510)KTYNMR    | 1199.1598       | 0      | decoy  | PFN(1338.4314)MTGLENKYNDRHQHR    | 1199.1713       | 1.7558  |
| decoy  | DYN(2392.8995)STFKAKEK   | 1199.161        | 0      | decoy  | PN(1379.3610)ASLDPMVVRQEFECVVK   | 1199.1532       | 1.7558  |
| decoy  | YN(2346.7617)STVVPVKK    | 1199.157        | 0      | decoy  | WCFGN(1356.5501)SSNDWRDLRGNVR    | 1199.1952       | 0       |
| decoy  | MN(2457.9191)ATVWFLR     | 1199.1737       | 0      | decoy  | VVEWDHRGFDNAGGN(1445.5196)HSPR   | 1199.1751       | 0       |
| decoy  | GCN(2379.0307)DTVEYMK    | 1199.1809       | 0      | decoy  | EAQEFVMHN(1324.3931)RSQVDLWPGK   | 1199.1684       | 0       |

**Supplementary Table 1.** The decoy glycopeptides and their scoring results returned by GPE for the four incorrect glycopeptides that were input as target candidates (labeled in red). The four target glycopeptide compositions are NAAGMFSEPSDSSGAIAR+ [Hex]7[HexNAc]3 (3+, *m/z* 1199.16), WEPPLDDGGSEIINYTLEK+ [Hex]5[HexNAc]3 (3+, *m/z* 1199.19), TCILEILNSTK+[Hex]4[HexNAc]6[Fuc]1[Neu5Ac]1(3+, *m/z* 1199.18), and LN<sub>N</sub>GSAPIQVCWYRDGVLLR+[Hex]3[HexNAc]4[SO<sub>3</sub>]1(3+, *m/z* 1199.20) (*N* is the glycosylation site).
